# Supplementary material for: Stroke network performance during the first COVID-19 pandemic stage: A meta-analysis based on stroke network models
Source: PubMed Central journal article supplement (PMC8521356; doi:10.1177/17474930211041202), 2021-08-28
Supplement: sj-pdf-1-wso-10.1177_17474930211041202.pdf [file sj-pdf-1-wso-10.1177_17474930211041202.pdf]

# SUPPLEMENTAL MATERIAL

---

## Literature search string

**Supplemental material – Figure I.** PRISMA flow-chart.

**Supplemental material – Table I.** Excluded studies.

**Supplemental material – Table II.** Bias assessment.

**Supplemental material – Table III.** Meta-regression analysis for time of rescue and reperfusion depending on stroke network model.

**Supplemental material – Figure II.** Funnel plots for studies reporting incidence rate ratio (IRR) of stroke admissions (top), intravenous thrombolysis rate ratio (center) and endovascular treatment rate ratio (bottom) in the two timeframes.

**Supplemental material – Figure III.** Combinatorial meta-analysis showing homogeneous distribution and no cluster segregation for weekly stroke admissions incidence rate ratio (IRR, top), weekly intravenous thrombolysis rate ratio (center), and endovascular thrombectomy (bottom).

**Supplemental material – Figure IV.** Meta-analysis of intravenous thrombolysis incidence (IVT-IRR, top) and endovascular thrombectomy incidence rate ratio (EVT-IRR, bottom), comparing stroke admissions during COVID-period vs control-period, depending on stroke network model.

**Supplemental material – Figure V.** Variations in National Institutes of Health Stroke Scale (NIHSS) score between COVID-period and control-period, depending on stroke network model (top). Sensitivity analysis excluding studies with unknown stroke network model (centre), and restricting analysis to studies with prospective design only (bottom).

**Supplemental material – Figure VI.** Variations in the proportion of people with large vessel occlusion among those presenting with acute ischemic stroke during the timeframes considered (COVID-period vs control-period), depending on stroke network model.

**Supplemental material – Figure VII.** Sensitivity analysis for proportion of patients undergoing intravenous thrombolysis (IVT) among those admitted with acute ischemic stroke during the timeframes considered (COVID-period vs control-period), removing studies with unknown stroke network model (top), or including only prospective studies (bottom).

**Supplemental material – Figure VIII.** Sensitivity analysis for proportion of patients undergoing endovascular treatment (EVT) among those admitted with acute ischemic stroke during the timeframes considered (COVID-period vs control-period), removing studies with unknown stroke network model (top), or including only prospective studies (bottom).

**Supplemental material – Figure IX.** Sensitivity analysis for onset-to-door time across the timeframes considered, removing studies with unknown stroke network model (top), or including only prospective studies (bottom).

**Supplemental material – Figure X.** Variation in door-to-scan time depending on timeframes considered (COVID-19 period vs control period), with studies grouped for stroke network model used.

**Supplemental material – Figure XI.** Variation in door-to-needle time in patients receiving intravenous thrombolysis (IVT) for acute ischemic stroke during COVID-19 and control period, depending on stroke network model adopted.

**Supplemental material – Figure XII.** Variations in onset-to-needle time across the timeframes considered, depending on stroke network model organization.

**Supplemental material – Figure XIII.** Variations in door-to-groin time across the timeframes considered depending on stroke network model organization.

**Supplemental material – Figure XIV.** Sensitivity analysis for variations in door-to-groin time across the timeframes considered, removing studies with unknown stroke network model (top), or including only prospective studies (bottom).

**Supplemental material – Figure XV.** Variations in door-to-recanalization time across the timeframes considered depending on stroke network model organization.

**Literature search string**

("cerebrovascular disease" [All Fields] OR "stroke" [All Fields] OR cerebrovascular accident [All Fields]) AND ("coronavirus"[MeSH Terms] OR "coronavirus"[All Fields] OR "COVID-19"[Supplemental Concept] OR "severe acute respiratory syndrome coronavirus 2"[Supplemental Concept] OR COVID[All Fields] OR "covid-19"[All Fields] OR "covid19"[All Fields] OR "novel coronavirus"[All Fields] OR nCoV[All Fields] OR "SARS-CoV2"[All Fields]); until 8/10/2020, only 2019 or 2020 published papers, English language only.

Supplemental material – Figure I. PRISMA flow-chart.

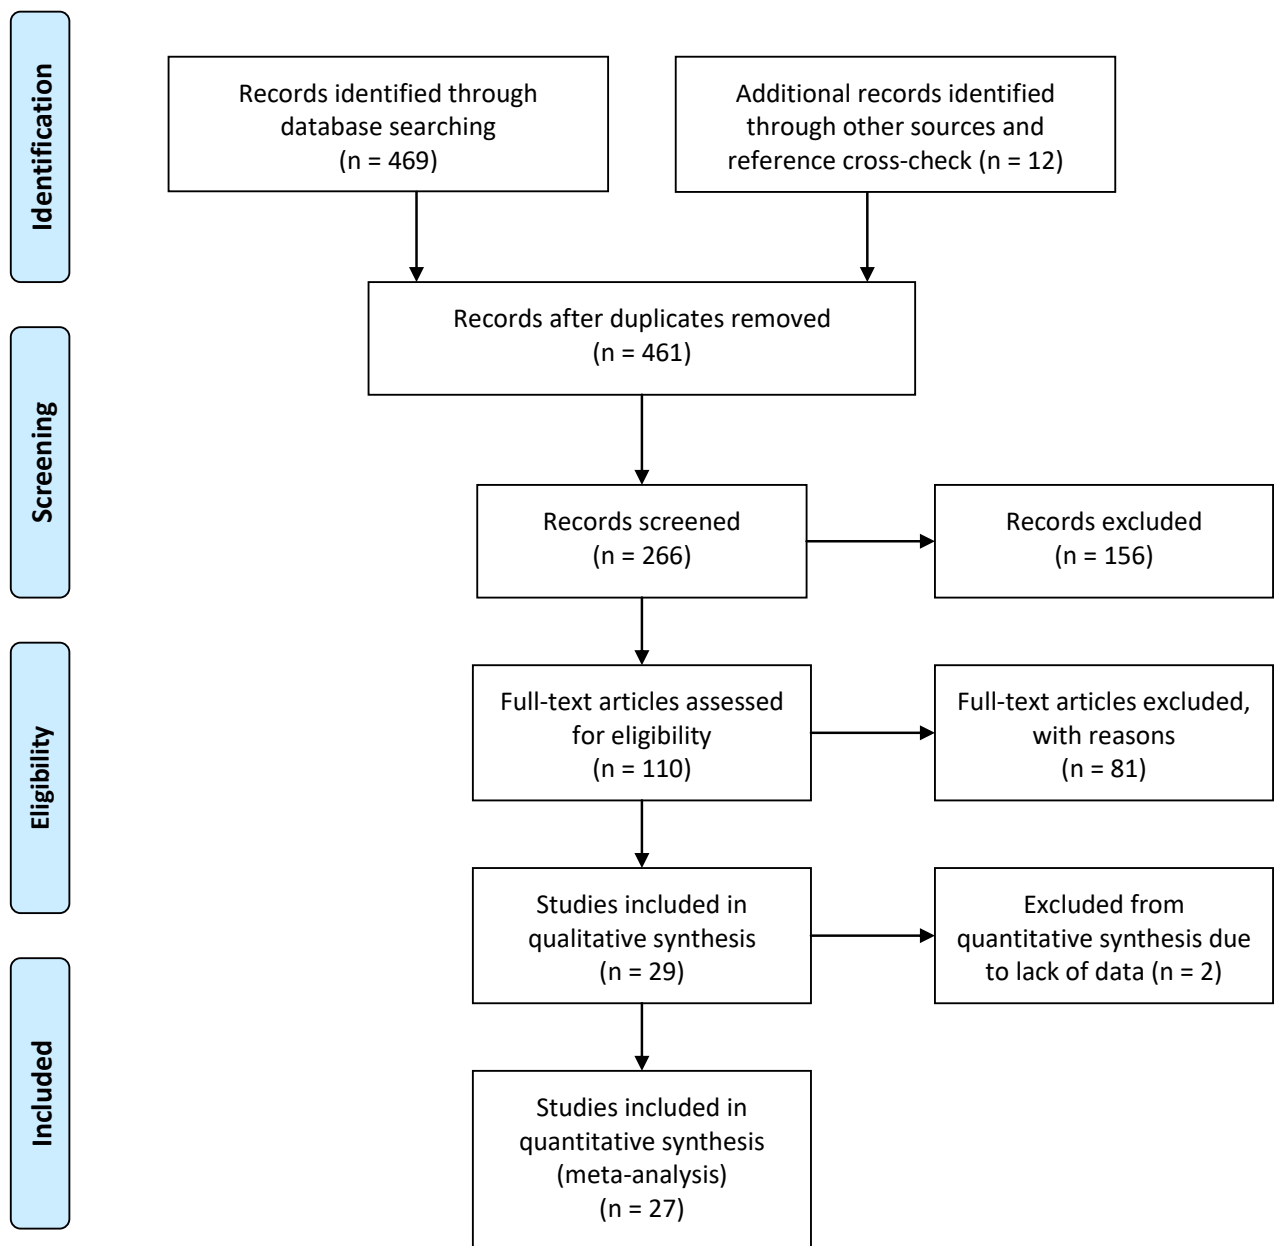

**Supplemental material – Table I. Excluded studies**

| <b>Author</b>         | <b>Year</b> | <b>Reason for exclusion</b>                                   |
|-----------------------|-------------|---------------------------------------------------------------|
| Aggarwal[1]           | 2020        | No data, association of stroke with/without COVID             |
| Al Kasab[2]           | 2020        | Letter to the editor, no data                                 |
| Al-Ani[3]             | 2020        | Review on thrombosis risk in COVID                            |
| Alqahtani[4]          | 2020        | Description of code stroke protocol, no data                  |
| Azarpazhooh[5]        | 2020        | No data on stroke admissions/incidence                        |
| Beghi[6]              | 2020        | Review only, no data                                          |
| Belani[7]             | 2020        | No data, only COVID cohort                                    |
| Bersano[8]            | 2020        | Recommendation only, no data                                  |
| Bhaskar[9]            | 2020        | Guidelines, no data                                           |
| Bress Bullrich[10]    | 2020        | Unclear identification of stroke (ischemic/hemorrhagic)       |
| Cantador[11]          | 2020        | No data, only COVID cohort                                    |
| Cavallieri[12]        | 2020        | Case report                                                   |
| Chaturvedi[13]        | 2020        | Recommendation only, no data                                  |
| Cummings[14]          | 2020        | Unclear identification of stroke                              |
| Dafer[15]             | 2020        | No data on stroke incidence/treatment                         |
| D'Anna[16]            | 2020        | No data, only COVID cohort                                    |
| de Sousa[17]          | 2020        | Editorial, no data                                            |
| Derraz[18]            | 2020        | Editorial, no data                                            |
| Escalard[19]          | 2020        | Case series, EVT in COVID+ patients                           |
| Frisullo[20]          | 2020        | No data, letter                                               |
| Frisullo[21]          | 2020        | No data                                                       |
| Fuentes[22]           | 2020        | Survey, no data                                               |
| Gao[23]               | 2020        | No data on stroke incidence/treatment                         |
| Goldberg[24]          | 2020        | Case report                                                   |
| Goyal[25]             | 2020        | No data                                                       |
| Gulko[26]             | 2020        | Case report                                                   |
| Hajdu[27]             | 2020        | Multiple timepoints, no raw data, EVT only                    |
| Hecht[28]             | 2020        | No data on stroke incidence/treatment                         |
| Holt[29]              | 2020        | Not pertinent (addressed new-onset atrial fibrillation)       |
| Hoyer[30]             | 2020        | No data (TIA/stroke admissions considered; data not provided) |
| Immovilli[31]         | 2020        | No data, only COVID cohort                                    |
| Jillela[32]           | 2020        | No control group, case series                                 |
| Jin[33]               | 2020        | MERS, not SARS-CoV2                                           |
| Kansagra[34]          | 2020        | No data on stroke incidence/treatment                         |
| Katz[35]              | 2020        | No data, only COVID cohort                                    |
| Khosravani[36]        | 2020        | Description of protected code stroke, no data                 |
| Lange[37]             | 2020        | Unclear identification of stroke (ischemic/hemorrhagic)       |
| Leira[38]             | 2020        | Review, no original data                                      |
| Leslie-Mazwi[39]      | 2020        | Review, no original data                                      |
| Li[40]                | 2020        | No data on stroke incidence/treatment                         |
| Lima[41]              | 2020        | Case report                                                   |
| Lumley-Holmes[42]     | 2020        | Letter, no data                                               |
| Majidi[43]            | 2020        | No temporal trend comparison                                  |
| Maldonad Sloopjes[44] | 2020        | Case report                                                   |
| Mansoor[45]           | 2020        | case report                                                   |
| Markus[46]            | 2020        | Editorial, no data                                            |
| Masroor[47]           | 2020        | Case report                                                   |
| Merkler[48]           | 2020        | No data, only COVID cohort                                    |
| Meyer[49]             | 2020        | No data                                                       |
| Mishra[50]            | 2020        | Letter to the editor, no data                                 |
| Mohamud[51]           | 2020        | Case series on COVID, no data                                 |
| Morelli[52]           | 2020        | Control period not defined                                    |
| Morelli[53]           | 2020        | Reply, no data                                                |
| Nguyen[54]            | 2020        | Recommendation only, no data                                  |
| Ntaios[55]            | 2020        | No temporal trend comparison                                  |
| Ospel[56]             | 2020        | Recommendation only, no data                                  |
| Pasarikovski[57]      | 2020        | No raw data                                                   |
| Paterson[58]          | 2020        | No raw data                                                   |
| Pedicelli[59]         | 2020        | No raw data                                                   |
| Qureshi [60]          | 2020        | Recommendation only                                           |
| Qureshi [61]          | 2020        | Not pertinent                                                 |
| Qureshi[62]           | 2020        | No data on stroke incidence/treatment                         |

|                        |      |                                                                        |
|------------------------|------|------------------------------------------------------------------------|
| Reddy[63]              | 2020 | Review only, no data                                                   |
| Rodriguez-Pardo [64]   | 2020 | Recommendation only                                                    |
| Saggese[65]            | 2020 | Case report                                                            |
| Salahuddin[66]         | 2020 | Recommendation only                                                    |
| Sangalli[67]           | 2020 | Case series                                                            |
| Shahjouei[68]          | 2020 | No control group, hospitalized patients only                           |
| Sheth[69]              | 2020 | No data                                                                |
| Sierra-Hidalgo[70]     | 2020 | No data, only COVID cohort                                             |
| Sweid[71]              | 2020 | Case series, COVID cohort                                              |
| Sylaja[72]             | 2020 | Survey, no data                                                        |
| Tsivgoulis[73]         | 2020 | Editorial                                                              |
| Valdes Valderrama[74]  | 2020 | Case report                                                            |
| Varatharaj[75]         | 2020 | Survey of acute neurological and psychiatric complications of COVID-19 |
| Venketasubramanian[76] | 2020 | Editorial, no data                                                     |
| Wang[77]               | 2020 | Commentary, no data                                                    |
| Yaeger[78]             | 2020 | No data, only COVID cohort                                             |
| Yaghi[79]              | 2020 | Stroke patients with COVID vs without COVID vs historical cohort       |
| Zhai[80]               | 2020 | Case report                                                            |
| Zhao[81]               | 2020 | Editorial, no data                                                     |

**Supplemental material – Table II. Bias assessment.**

| Author                     | Year | 1) Representativeness of the exposed cohort | 2) Selection of the non exposed cohort | 3) Ascertainment of exposure | 4) Demonstration that outcome of interest was not present at start of study | 5) comparability of the cohorts included | 6) Assessment of outcome | 7) Length of follow-up | 8) Adequacy of follow up of cohorts | Global score | Risk of bias |
|----------------------------|------|---------------------------------------------|----------------------------------------|------------------------------|-----------------------------------------------------------------------------|------------------------------------------|--------------------------|------------------------|-------------------------------------|--------------|--------------|
| Agarwal[82]                | 2020 | 1                                           | 1                                      | 1                            | 1                                                                           | 1                                        | 1                        | 1                      | 1                                   | 8            | low          |
| Baracchini[83]             | 2020 | 0                                           | 0                                      | 1                            | 1                                                                           | 0                                        | 0                        | 0                      | 0                                   | 2            | high         |
| De Havenon[84]             | 2020 | 1                                           | 1                                      | 1                            | 1                                                                           | 1                                        | 1                        | 1                      | 1                                   | 8            | low          |
| Diegoli[85]                | 2020 | 1                                           | 1                                      | 1                            | 1                                                                           | 1                                        | 1                        | 1                      | 1                                   | 8            | low          |
| Esenwa[86]                 | 2020 | 1                                           | 1                                      | 0                            | 1                                                                           | 1                                        | 1                        | 1                      | 1                                   | 7            | low          |
| Hsiao[87]                  | 2020 | 1                                           | 1                                      | 1                            | 1                                                                           | 1                                        | 1                        | 1                      | 1                                   | 8            | low          |
| Huang[88]                  | 2020 | 1                                           | 1                                      | 1                            | 1                                                                           | 2                                        | 1                        | 1                      | 1                                   | 9            | low          |
| Jasne[89]                  | 2020 | 1                                           | 1                                      | 1                            | 1                                                                           | 1                                        | 1                        | 1                      | 1                                   | 8            | low          |
| Kerleroux[90]*             | 2020 | 1                                           | 1                                      | 1                            | 1                                                                           | 1                                        | 1                        | 0                      | 1                                   | 7            | low          |
| Mehrpour[91]               | 2020 | 0                                           | 1                                      | 1                            | 1                                                                           | 1                                        | 1                        | 1                      | 1                                   | 7            | low          |
| Montaner[92]               | 2020 | 1                                           | 1                                      | 1                            | 1                                                                           | 0                                        | 1                        | 0                      | 0                                   | 5            | moderate     |
| Naccarato[93]              | 2020 | 1                                           | 1                                      | 1                            | 1                                                                           | 1                                        | 1                        | 1                      | 1                                   | 8            | low          |
| Nguyen-Huynh[94]           | 2020 | 1                                           | 1                                      | 1                            | 1                                                                           | 1                                        | 1                        | 1                      | 1                                   | 8            | low          |
| Onteddu[95]                | 2020 | 1                                           | 1                                      | 0                            | 1                                                                           | 1                                        | 1                        | 1                      | 1                                   | 7            | low          |
| Paliwal[96]                | 2020 | 1                                           | 1                                      | 1                            | 1                                                                           | 2                                        | 1                        | 1                      | 1                                   | 9            | low          |
| Pandey[97]                 | 2020 | 1                                           | 1                                      | 1                            | 1                                                                           | 1                                        | 1                        | 1                      | 1                                   | 8            | low          |
| Perry[98]                  | 2020 | 1                                           | 1                                      | 0                            | 0                                                                           | 2                                        | 0                        | 0                      | 0                                   | 4            | moderate     |
| Pop[99]                    | 2020 | 1                                           | 1                                      | 1                            | 1                                                                           | 1                                        | 1                        | 0                      | 1                                   | 7            | low          |
| Rudilosso[100]             | 2020 | 1                                           | 1                                      | 0                            | 1                                                                           | 1                                        | 1                        | 1                      | 1                                   | 7            | low          |
| Saxhaug Kristoffersen[101] | 2020 | 1                                           | 1                                      | 1                            | 1                                                                           | 2                                        | 1                        | 1                      | 1                                   | 9            | low          |
| Schirmer[102]              | 2020 | 1                                           | 1                                      | 1                            | 1                                                                           | 0                                        | 1                        | 1                      | 1                                   | 7            | low          |
| Siegler[103]               | 2020 | 1                                           | 1                                      | 1                            | 1                                                                           | 1                                        | 1                        | 1                      | 1                                   | 8            | low          |
| Strasser[104]              | 2020 | 1                                           | 1                                      | 1                            | 1                                                                           | 1                                        | 1                        | 1                      | 1                                   | 8            | low          |
| Tejada Meza[105]           | 2020 | 1                                           | 1                                      | 1                            | 1                                                                           | 1                                        | 1                        | 1                      | 1                                   | 8            | low          |
| Tejada Meza[106]           | 2020 | 1                                           | 1                                      | 1                            | 1                                                                           | 1                                        | 1                        | 0                      | 1                                   | 7            | low          |
| Teo[107]                   | 2020 | 1                                           | 1                                      | 1                            | 1                                                                           | 1                                        | 0                        | 1                      | 1                                   | 7            | low          |
| Yang[108]                  | 2020 | 1                                           | 1                                      | 1                            | 1                                                                           | 1                                        | 1                        | 0                      | 1                                   | 7            | low          |
| Zhao[109]*                 | 2020 | 1                                           | 1                                      | 0                            | 1                                                                           | 1                                        | 0                        | 0                      | 0                                   | 4            | moderate     |
| Zini[110]                  | 2020 | 1                                           | 1                                      | 1                            | 1                                                                           | 1                                        | 1                        | 1                      | 1                                   | 8            | low          |

**Supplemental material – Table III.** Meta-regression analysis for time of rescue and reperfusion depending on stroke network model.

Legend. CI=confidence interval; NA=not available.

| <b>Time and model</b>  | <b>Estimate (95%CI)(minutes)</b> | <b>p-value</b> |
|------------------------|----------------------------------|----------------|
| <b>Onset-to-door</b>   |                                  |                |
| Drip&ship              | reference                        | //             |
| Mothership             | -44.3 (-85.3 - -3.2)             | 0.03           |
| Unknown                | -17.8 (-115.3 - +79.6)           | 0.7            |
| <b>Door-to-groin</b>   |                                  |                |
| Drip&ship              | reference                        | //             |
| Mothership             | -14.4 (-10.5 - +39.23)           | 0.26           |
| Unknown                | 10.2 (-23.4 - +43.7)             | 0.55           |
| <b>Onset-to-needle</b> |                                  |                |
| Drip&ship              | reference                        | //             |
| Mothership             | -36.0 (-142.9 - +70.4)           | 0.50           |
| Unknown                | NA                               | NA             |



**Supplemental material – Figure II.** Funnel plots for studies reporting incidence rate ratio (IRR) of stroke admissions (top), intravenous thrombolysis rate ratio (center) and endovascular treatment rate ratio (bottom) in the two timeframes.

Legend. Light blue:  $p < 0.05$ ; Dark blue:  $p < 0.01$ ; Dots: studies.

**Stroke admissions IRR**

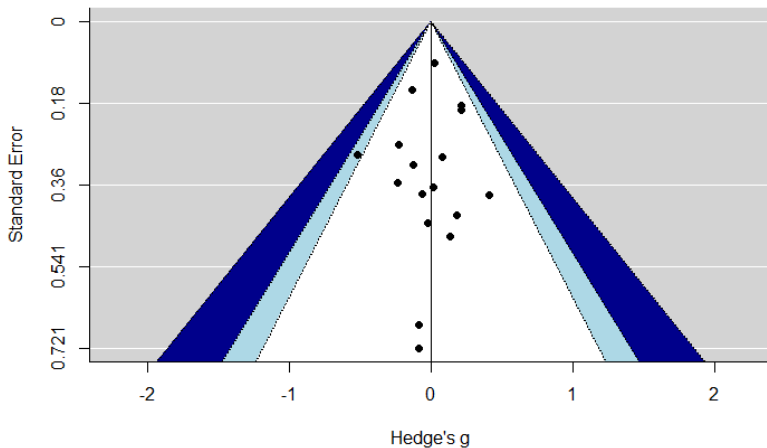

**Intravenous thrombolysis IRR**

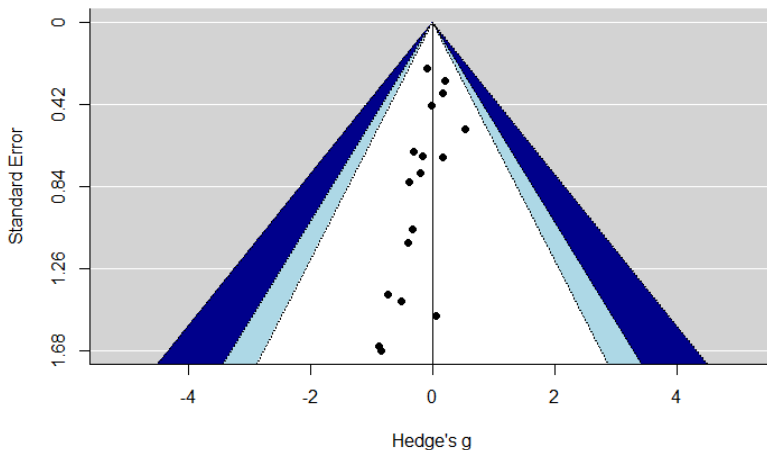

**Endovascular thrombectomy IRR**

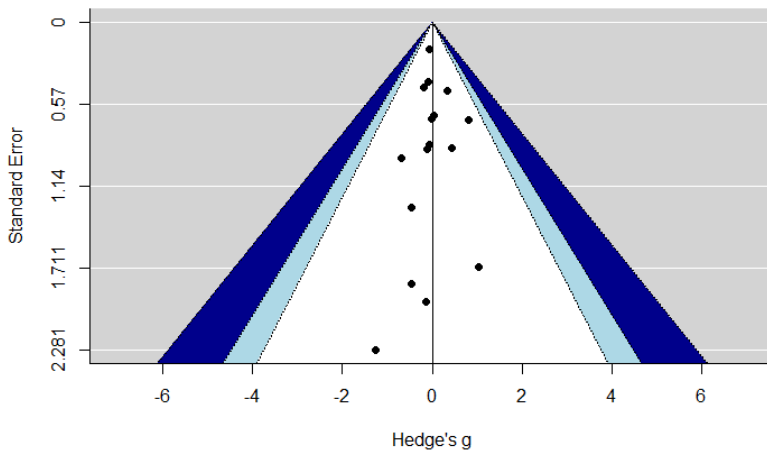

**Supplemental material – Figure III.** Combinatorial meta-analysis showing homogeneous distribution and no cluster segregation for weekly stroke admissions incidence rate ratio (IRR, top), weekly intravenous thrombolysis rate ratio (center), and endovascular thrombectomy (bottom).

**Stroke admissions IRR**

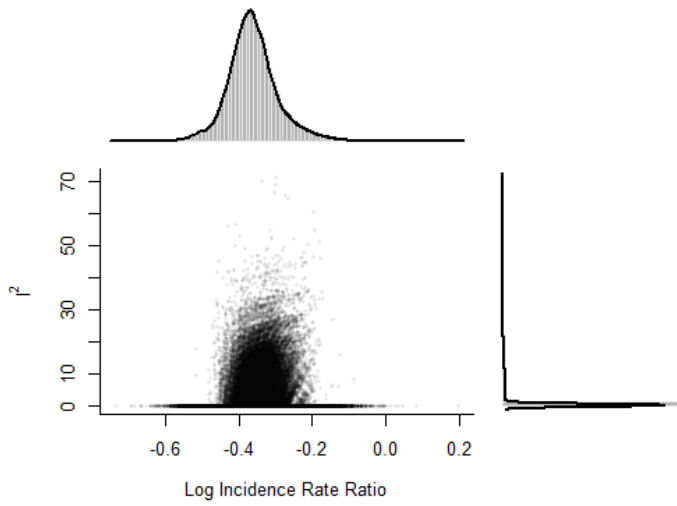

**Intravenous thrombolysis-IRR**

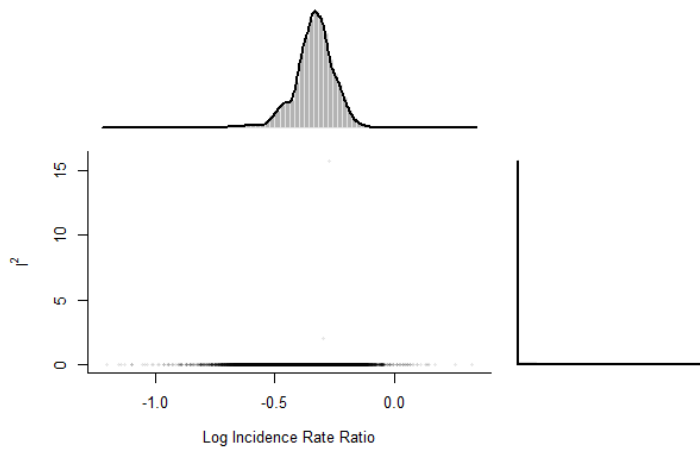

**Endovascular thrombectomy-IRR**

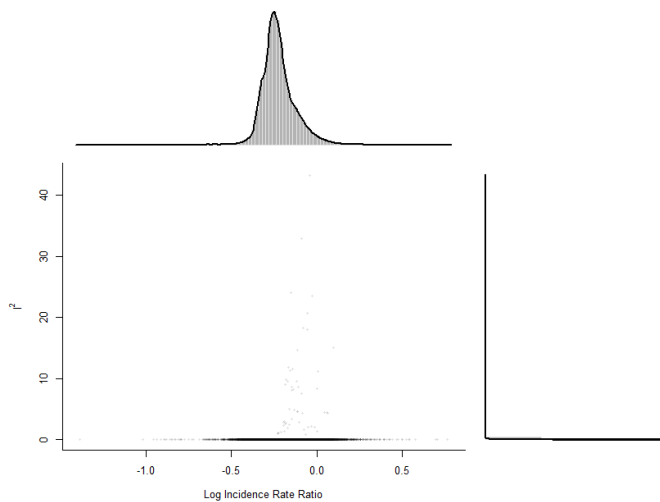

**Supplemental material – Figure IV.** Meta-analysis of intravenous thrombolysis incidence (IVT-IRR, top) and endovascular thrombectomy incidence rate ratio (EVT-IRR, bottom), comparing stroke admissions during COVID-period vs control-period, depending on stroke network model.

Legend. CI: confidence interval; EVT: endovascular thrombectomy; IRR: incidence rate ratio (equals treatment rate during COVID-19 period/treatment rate during control period); IVT: intravenous thrombolysis; RE: random effect.

### IVT-IRR

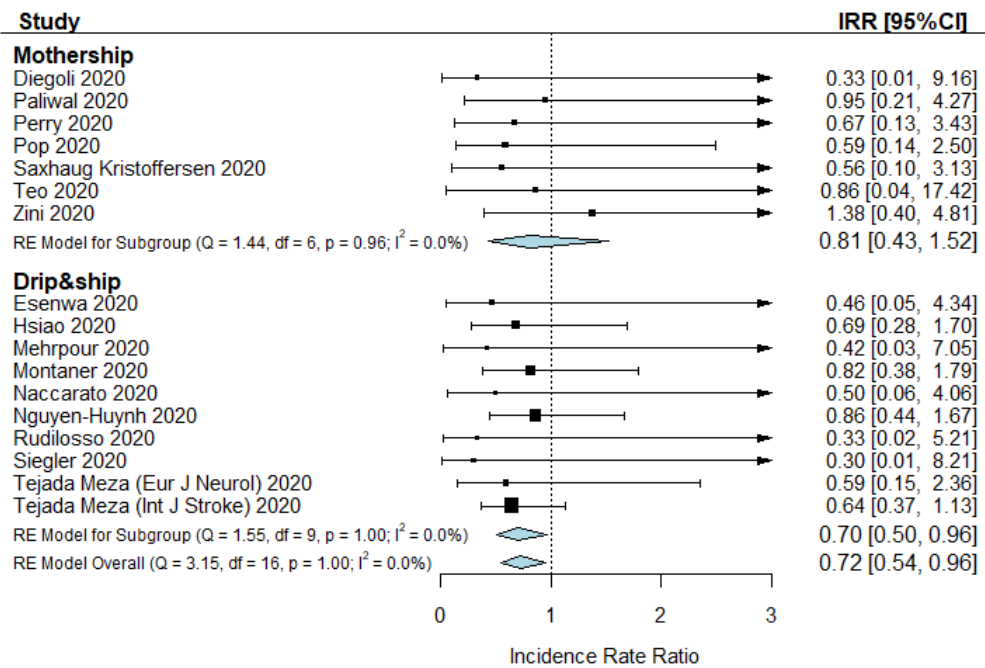

### EVT-IRR

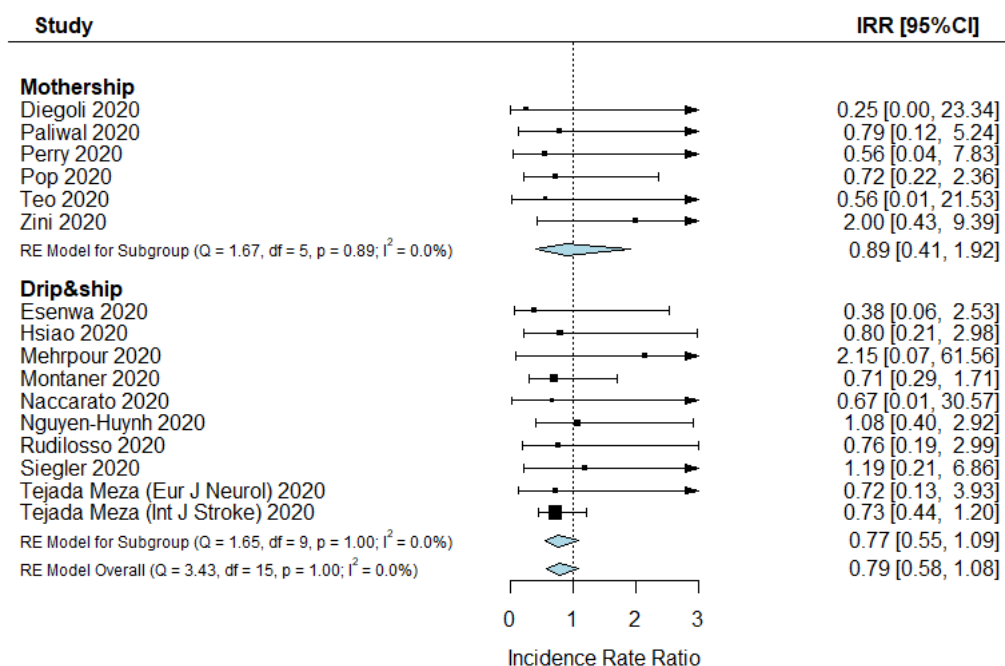

**Supplemental material – Figure V.** Variations in National Institutes of Health Stroke Scale (NIHSS) score between COVID-period and control-period, depending on stroke network model (top). Sensitivity analysis excluding studies with unknown stroke network model (centre), and restricting analysis to studies with prospective design only (bottom).

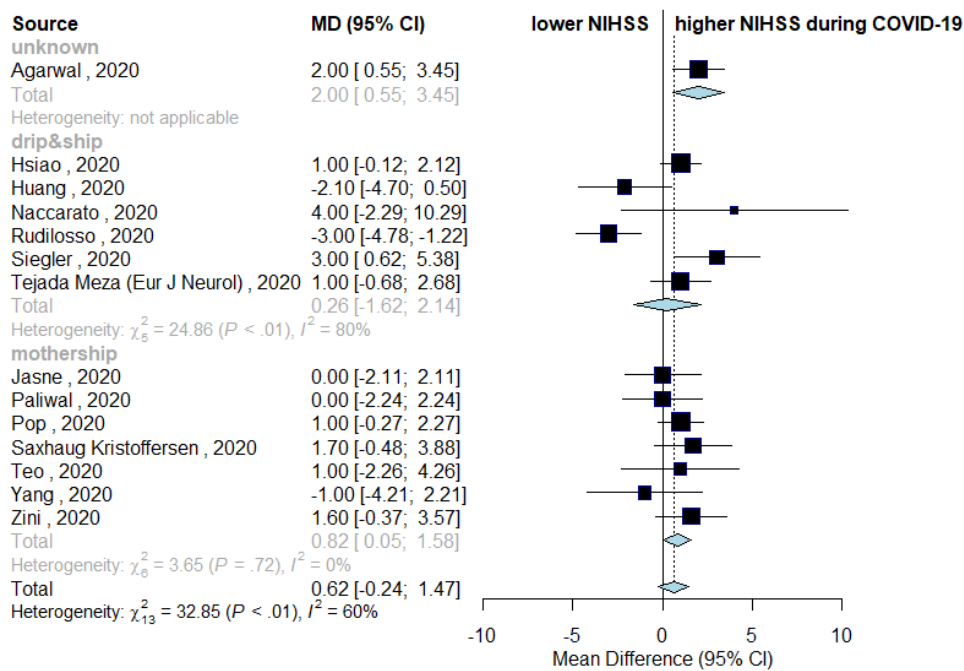

**Sensitivity analysis excluding studies with unknown stroke network model**

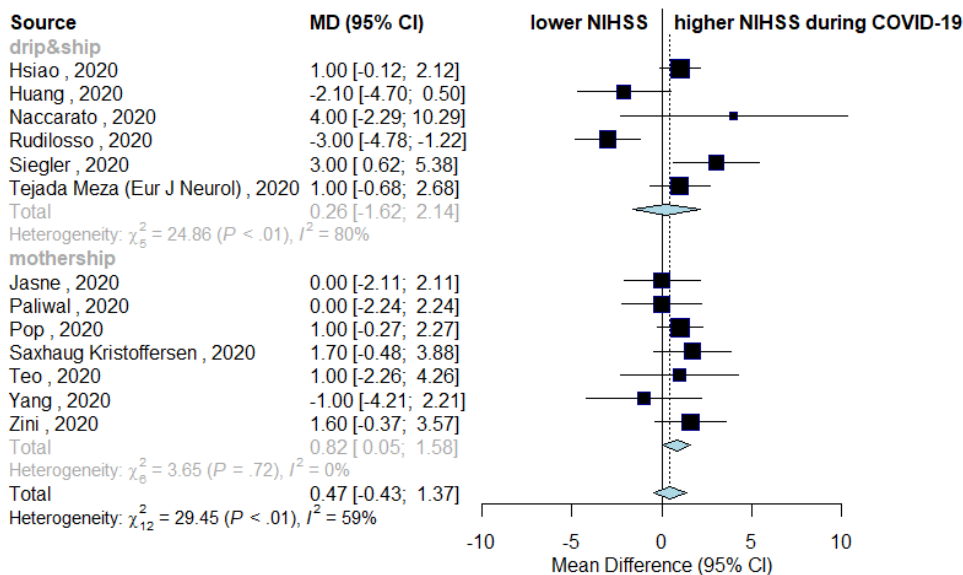

**Sensitivity analysis with prospective design-only studies**

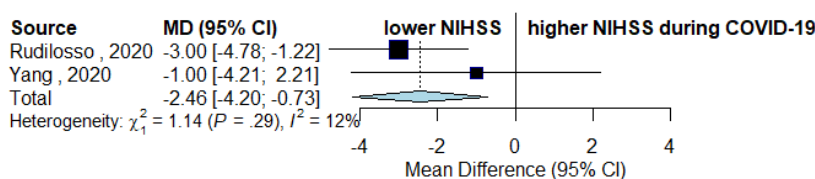

**Supplemental material – Figure VI.** Variations in the proportion of people with large vessel occlusion among those presenting with acute ischemic stroke during the timeframes considered (COVID-period vs control-period), depending on stroke network model.

Legend. CI=confidence interval; COVID=period of SARS-CoV-2 pandemic (coronavirus pandemic); RR=relative risk.

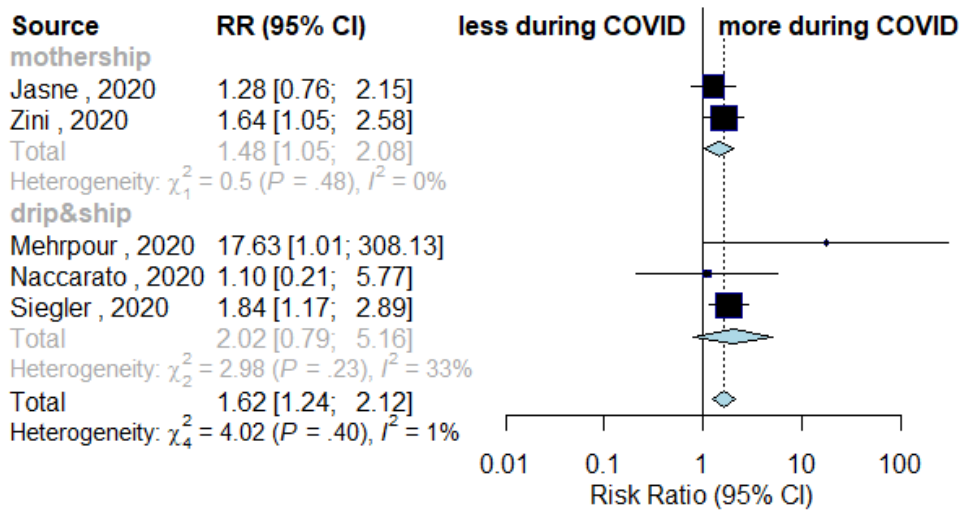

**Supplemental material – Figure VII.** Sensitivity analysis for proportion of patients undergoing intravenous thrombolysis (IVT) among those admitted with acute ischemic stroke during the timeframes considered (COVID-period vs control-period), removing studies with unknown stroke network model (top), or including only prospective studies (bottom).

Legend. CI=confidence interval; COVID=period of SARS-CoV-2 pandemic (coronavirus pandemic); RR=relative risk.

**Sensitivity analysis excluding studies with unknown stroke network model**

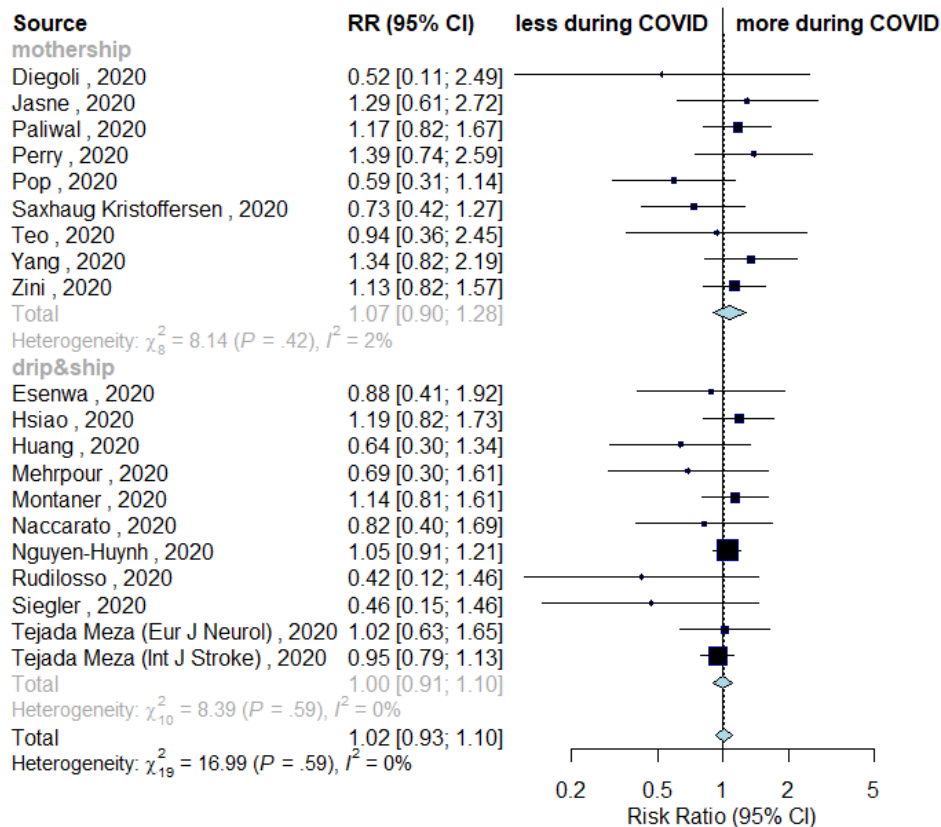

**Sensitivity analysis with prospective studies-only**

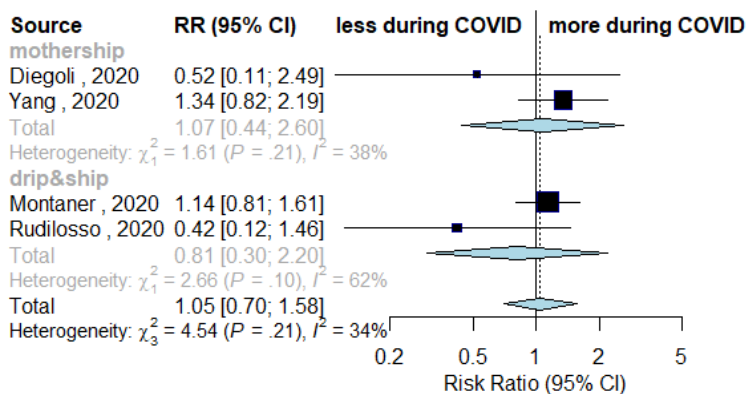

**Supplemental material – Figure VIII.** Sensitivity analysis for proportion of patients undergoing endovascular treatment (EVT) among those admitted with acute ischemic stroke during the timeframes considered (COVID-period vs control-period), removing studies with unknown stroke network model (top), or including only prospective studies (bottom).

Legend. CI=confidence interval; COVID=period of SARS-CoV-2 pandemic (coronavirus pandemic); RR=relative risk.

**Sensitivity analysis excluding studies with unknown stroke network model**

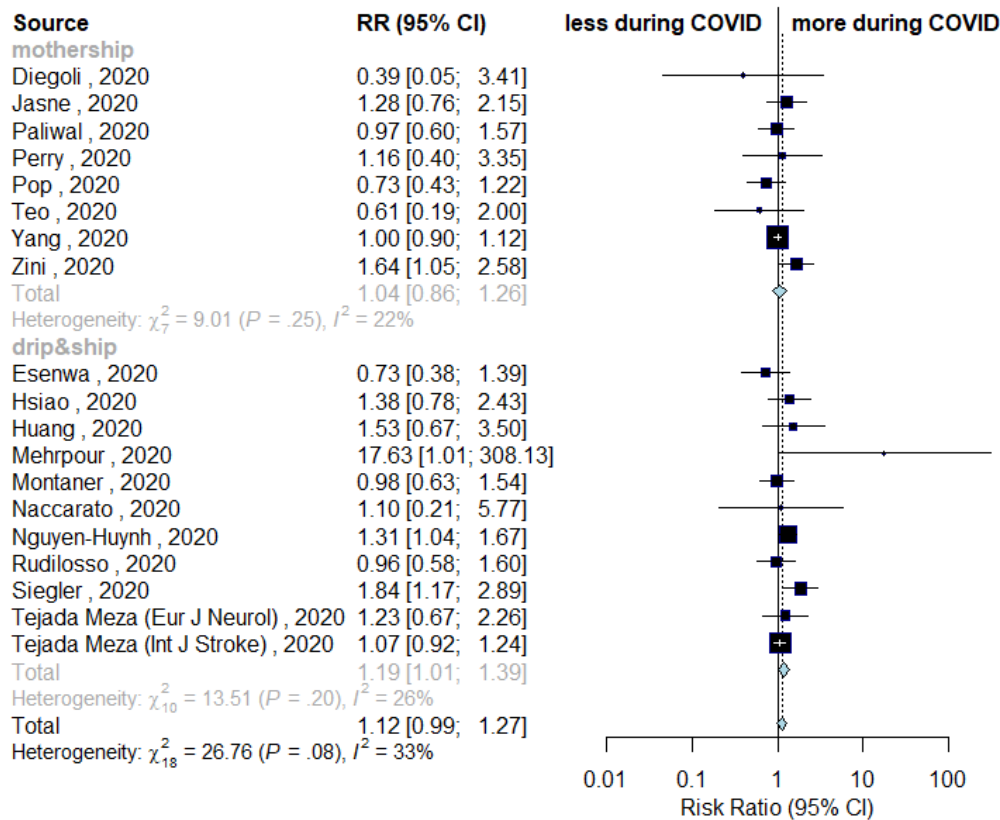

**Sensitivity analysis with prospective studies-only**

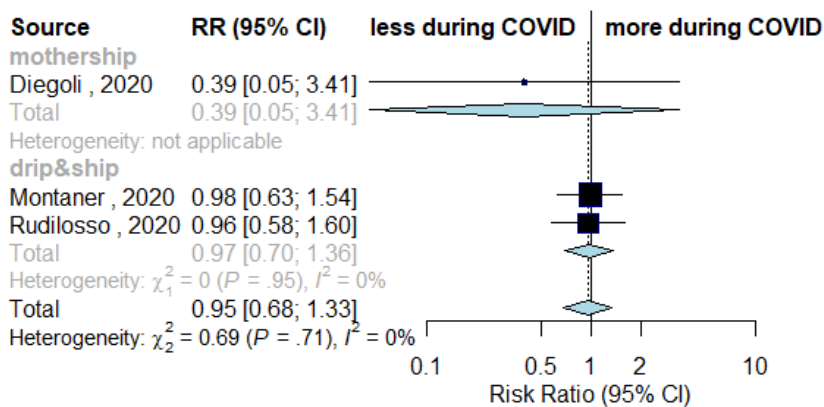

**Supplemental material – Figure IX.** Sensitivity analysis for onset-to-door time across the timeframes considered, removing studies with unknown stroke network model (top), or including only prospective studies (bottom).

Legend. CI=confidence interval; COVID-19=period of SARS-CoV-2 pandemic (coronavirus pandemic); MD=mean difference.

**Sensitivity analysis excluding studies with unknown stroke network model**

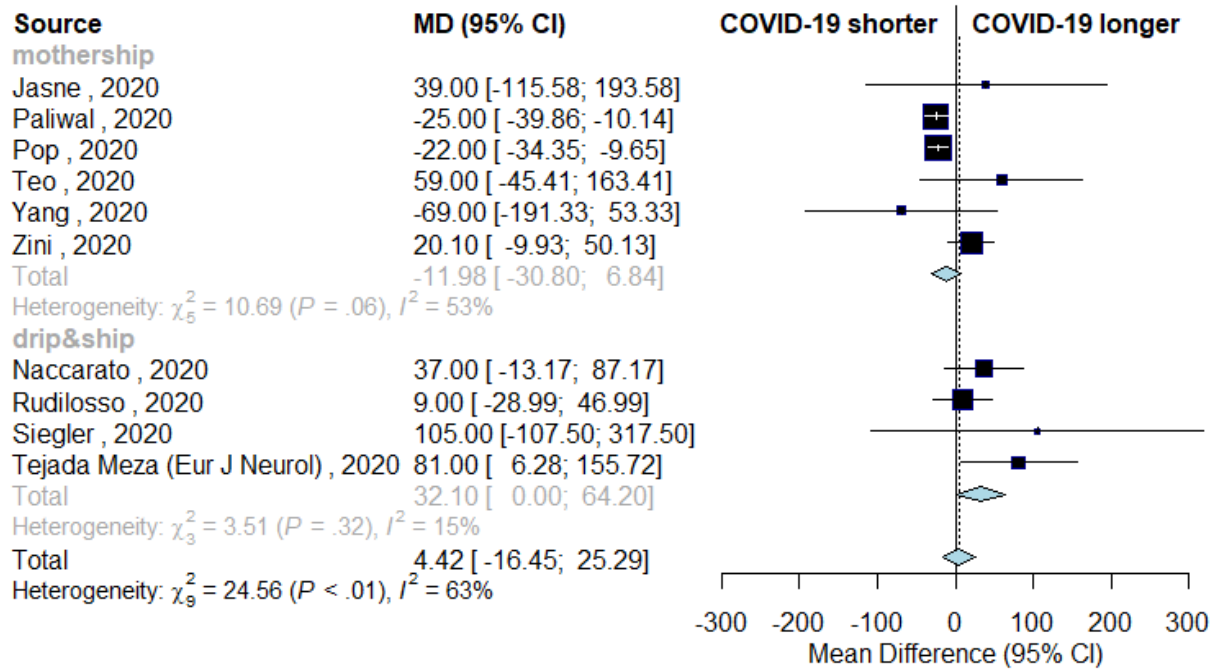

**Sensitivity analysis with prospective studies-only**

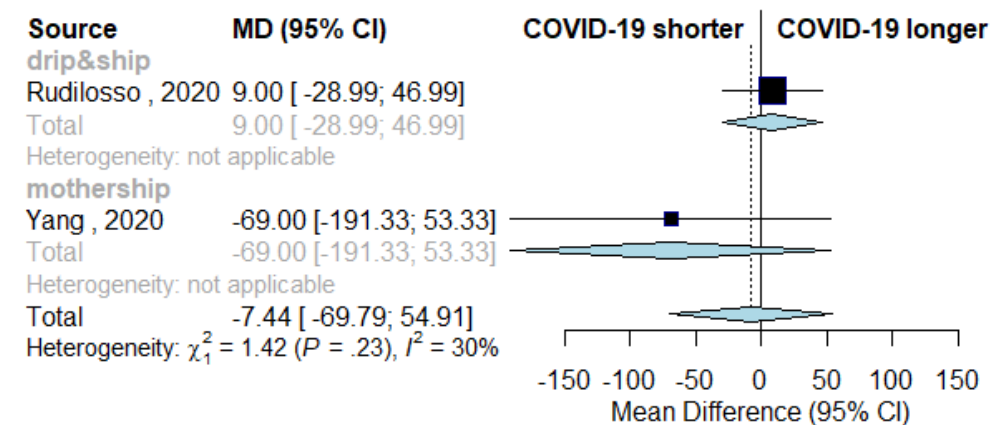



**Supplemental material – Figure X.** Variation in door-to-scan time depending on timeframes considered (COVID-19 period vs control period), with studies grouped for stroke network model used.

Legend. CI=confidence interval; COVID-19=period of SARS-CoV-2 pandemic (coronavirus pandemic); MD=mean difference.

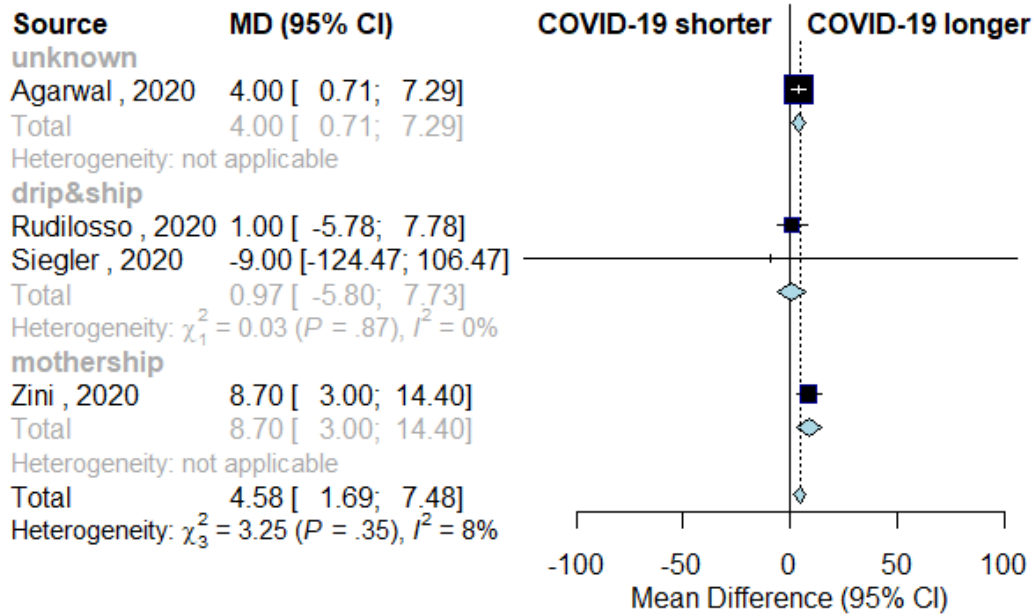

**Supplemental material – Figure XI.** Variation in door-to-needle time in patients receiving intravenous thrombolysis (IVT) for acute ischemic stroke during COVID-19 and control period, depending on stroke network model adopted.

Legend. CI=confidence interval; COVID-19=period of SARS-CoV-2 pandemic (coronavirus pandemic); MD=mean difference.

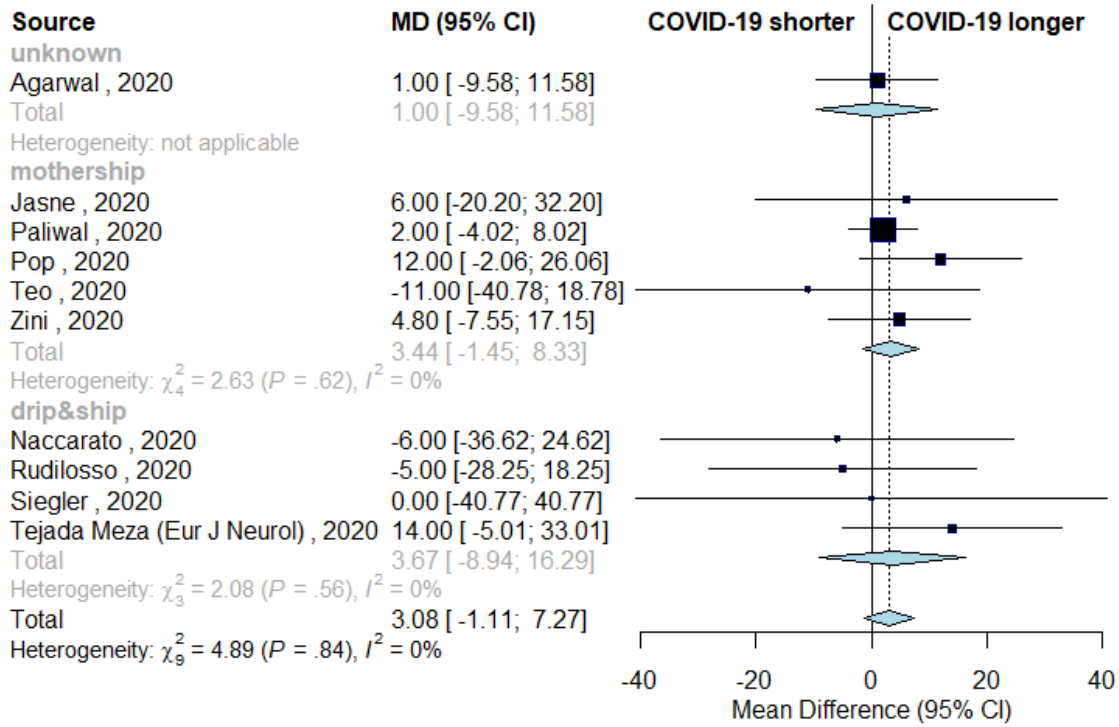

**Supplemental material – Figure XII.** Variations in onset-to-needle time across the timeframes considered, depending on stroke network model organization.

Legend. CI=confidence interval; COVID-19=period of SARS-CoV-2 pandemic (coronavirus pandemic); MD=mean difference.

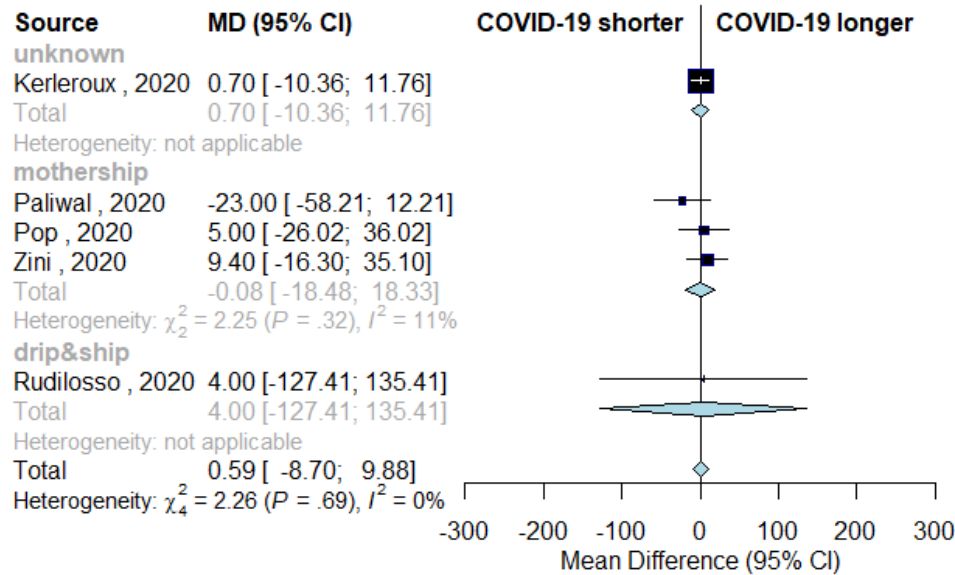

**Supplemental material – Figure XIII.** Variations in door-to-groin time across the timeframes considered depending on stroke network model organization.

Legend. CI=confidence interval; COVID-19=period of SARS-CoV-2 pandemic (coronavirus pandemic); MD=mean difference.

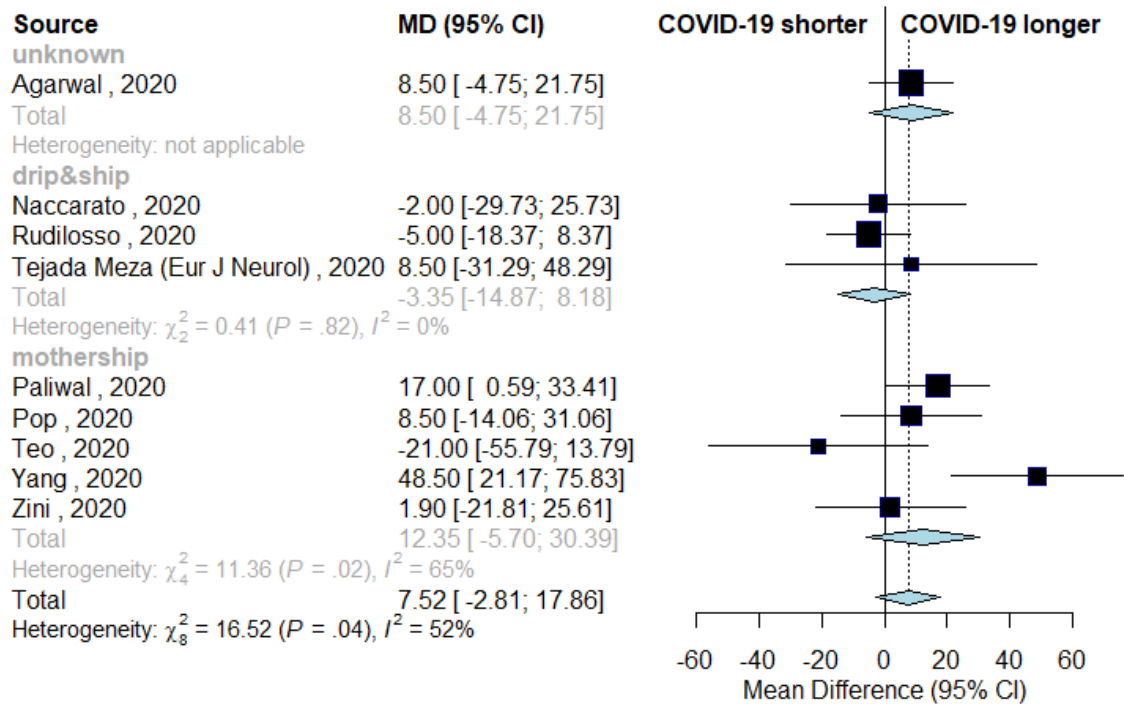

**Supplemental material – Figure XIV.** Sensitivity analysis for variations in door-to-groin time across the timeframes considered, removing studies with unknown stroke network model (top), or including only prospective studies (bottom).

Legend. CI=confidence interval; COVID-19=period of SARS-CoV-2 pandemic (coronavirus pandemic); MD=mean difference

**Sensitivity analysis excluding studies with unknown network organization**

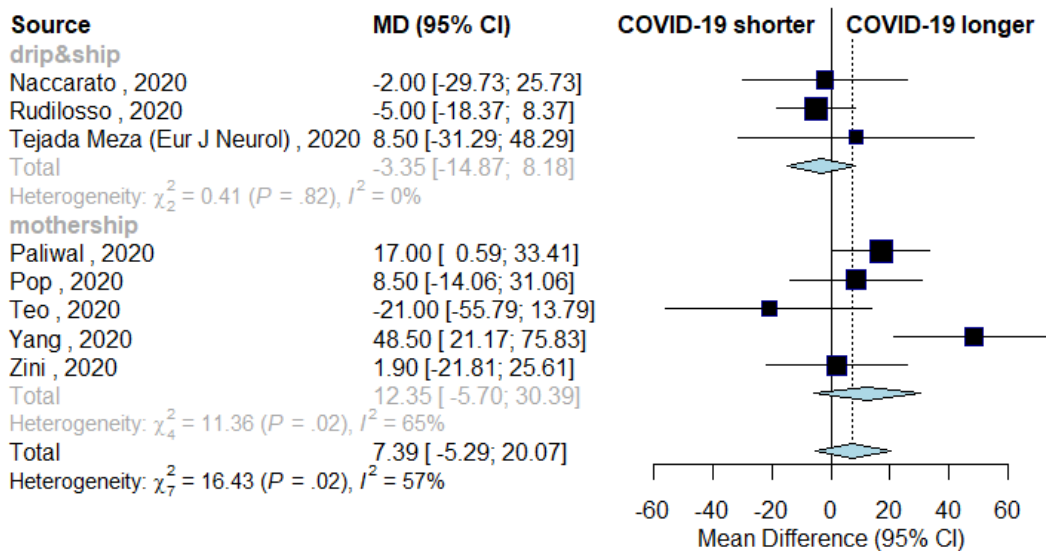

**Sensitivity analysis with prospective studies-only**

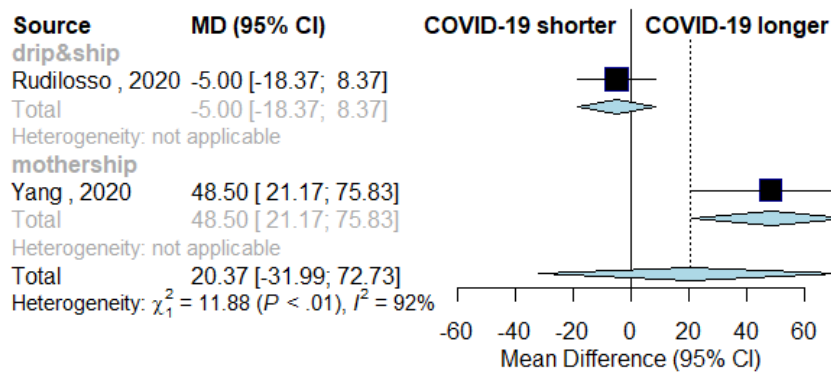

**Supplemental material – Figure XV.** Variations in door-to-recanalization time across the timeframes considered depending on stroke network model organization.

Legend. CI=confidence interval; COVID-19=period of SARS-CoV-2 pandemic (coronavirus pandemic); MD=mean difference.

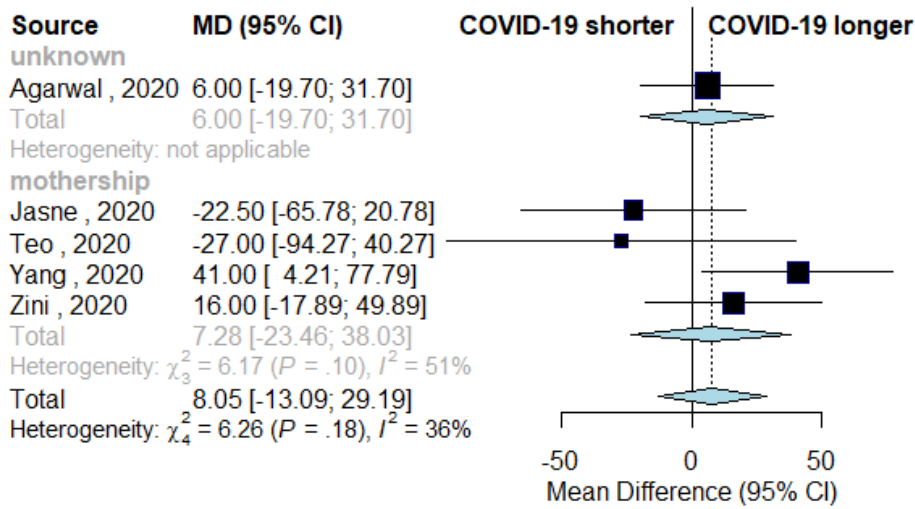

## References

- 1 Aggarwal G, Lippi G, Michael Henry B. Cerebrovascular disease is associated with an increased disease severity in patients with Coronavirus Disease 2019 (COVID-19): A pooled analysis of published literature. *Int J Stroke* 2020;**0**:1–5. doi:10.1177/1747493020921664
- 2 Al Kasab S, Almallouhi E, Spiotta AM. Acute Stroke Management During the Coronavirus Disease 2019 (COVID-19) Pandemic: From Trough of Disillusionment to Slope of Enlightenment. *World Neurosurg* 2020;**2019**:2019–20. doi:10.1016/j.wneu.2020.04.153
- 3 Al-Ani F, Chehade S, Lazo-Langner A. Thrombosis risk associated with COVID-19 infection. A scoping review. *Thromb Res* 2020;**192**:152–60. doi:10.1016/j.thromres.2020.05.039
- 4 Alqahtani SA, Alnaami I, Alhazzani A. Protected Stroke Mechanical Thrombectomy Code During the Coronavirus (COVID-19) Pandemic: Southwestern Part of Saudi Arabia Stroke Unit Local Protocol. *Cureus* 2020;**12**:4–9. doi:10.7759/cureus.7808
- 5 Azarpazhooh MR, Morovatdar N, Avan A, et al. COVID-19 Pandemic and Burden of Non-Communicable Diseases: An Ecological Study on Data of 185 Countries. *J Stroke Cerebrovasc Dis* 2020;**29**:105089. doi:10.1016/j.jstrokecerebrovasdis.2020.105089
- 6 Beghi E, Feigin V, Caso V, et al. COVID-19 Infection and Neurological Complications: Present Findings and Future Predictions. *Neuroepidemiology* 2020;:1–6. doi:10.1159/000508991
- 7 Belani P, Schefflein J, Kihira S, et al. COVID-19 Is an Independent Risk Factor for Acute Ischemic Stroke. *Am J Neuroradiol* 2020;:1–4. doi:10.3174/ajnr.a6650
- 8 Bersano A, Kraemer M, Touzé E, et al. Stroke care during the Covid-19 pandemic: Experience from three large European countries. *Eur J Neurol* Published Online First: 2020. doi:10.1111/ene.14375
- 9 Bhaskar S, Sharma D, Walker AH, et al. Acute Neurological Care in the COVID-19 Era: The Pandemic Health System RESilience PROGRAM (REPROGRAM) Consortium Pathway. *Front Neurol* 2020;**11**:1–8. doi:10.3389/fneur.2020.00579
- 10 Bres Bullrich M, Fridman S, Mandzia JL, et al. COVID-19: Stroke Admissions, Emergency Department Visits, and Prevention Clinic Referrals. *Can J Neurol Sci* 2020;**1**:1–10. doi:10.1017/cjn.2020.101
- 11 Cantador E, Núñez A, Sobrino P, et al. Incidence and consequences of systemic arterial thrombotic events in COVID-19 patients. *J Thromb Thrombolysis* 2020;:1–5. doi:10.1007/s11239-020-02176-7
- 12 Cavallieri F, Marti A, Fasano A, et al. Prothrombotic state induced by COVID-19 infection as trigger for stroke in young patients: A dangerous association. *eNeurologicalSci* 2020;**20**:18–20. doi:10.1016/j.ensci.2020.100247
- 13 Chaturvedi S, Gorelick P. The interplay between COVID 19 and non-communicable diseases. *J Stroke Cerebrovasc Dis* 2020;:105104. doi:10.1016/j.jstrokecerebrovasdis.2020.105104
- 14 Cummings C, Almallouhi E, Al Kasab S, et al. Blacks Are Less Likely to Present With Strokes During the COVID-19 Pandemic. *Stroke* 2020;:3107–11. doi:10.1161/strokeaha.120.031121
- 15 Dafer RM, Osteraas ND, Biller J. Acute Stroke Care in the Coronavirus Disease 2019 Pandemic. *J Stroke Cerebrovasc Dis* 2020;:104881. doi:10.1016/j.jstrokecerebrovasdis.2020.104881
- 16 D'Anna L, Kwan J, Brown Z, et al. Characteristics and clinical course of Covid-19 patients admitted with acute stroke. *J Neurol* Published Online First: 2020. doi:10.1007/s00415-020-10012-4
- 17 Aguiar de Sousa D, Worp HB. Stroke care in Europe during the COVID-19 pandemic. *Eur J Neurol* 2020;**27**:1793–1793. doi:10.1111/ene.14401
- 18 Derraz I. Stroke Health Care Use and COVID-19. *AJNR Am J Neuroradiol* 2020;:6563. doi:10.3174/ajnr.A6563
- 19 Escalard S, Maïer B, Redjem H, et al. Treatment of Acute Ischemic Stroke due to Large Vessel

- Occlusion With COVID-19. *Stroke* 2020;;1–4. doi:10.1161/strokeaha.120.030574
- 20 Frisullo G, De Belvis AG, Marca G Della, *et al.* Stroke integrated care pathway during COVID-19 pandemic. *Neurol Sci* 2020;;1–3. doi:10.1007/s10072-020-04480-9
- 21 Frisullo G, Brunetti V, Di Iorio R, *et al.* Effect of lockdown on the management of ischemic stroke: an Italian experience from a COVID hospital. *Neurol Sci* Published Online First: 2020. doi:10.1007/s10072-020-04545-9
- 22 Fuentes B, Alonso de Leciñana M, Calleja-Castaño P, *et al.* Impact of the COVID-19 pandemic on the organisation of stroke care. Madrid Stroke Care Plan. *Neurologia* Published Online First: 2020. doi:10.1016/j.nrl.2020.05.007
- 23 Gao Q. The epidemiological characteristics of an outbreak of 2019 novel coronavirus diseases (COVID-19) in China. *Zhonghua Liu Xing Bing Xue Za Zhi* 2020;**41**:145–51. doi:10.3760/cma.j.issn.0254-6450.2020.02.003
- 24 Goldberg MF, Goldberg MF. Cerebrovascular Disease in COVID-19. 2020;;1–3.
- 25 Goyal M, Ospel JM, Southerland AM, *et al.* Prehospital Triage of Acute Stroke Patients During the COVID-19 Pandemic. *Stroke* 2020;;1–5. doi:10.1161/strokeaha.120.030340
- 26 Gulko E, Gomes W, Ali S, *et al.* Acute Common Carotid Artery Bifurcation Thrombus: An Emerging Pattern of Acute Strokes in Patients with COVID-19? *Am J Neuroradiol* 2020;;1–2. doi:10.3174/ajnr.A6657
- 27 Hajdu SD, Pittet V, Puccinelli F, *et al.* Acute Stroke Management during the COVID-19 Pandemic: Does Confinement Impact Eligibility for Endovascular Therapy? *Stroke* 2020;**51**:2593–6. doi:10.1161/STROKEAHA.120.030794
- 28 Hecht N, Wessels L, Werft F-O, *et al.* Need for ensuring care for neuro-emergencies-lessons learned from the COVID-19 pandemic. *Acta Neurochir (Wien)* Published Online First: 2020. doi:10.1007/s00701-020-04437-z
- 29 Holt A, Gislason GH, Schou M, *et al.* New-onset atrial fibrillation: incidence, characteristics, and related events following a national COVID-19 lockdown of 5.6 million people. *Eur Heart J* 2020;;1–8. doi:10.1093/eurheartj/ehaa494
- 30 Hoyer C, Ebert A, Huttner HB, *et al.* Acute Stroke in Times of the COVID-19 Pandemic: A Multicenter Study. *Stroke* 2020;;STROKEAHA120030395. doi:10.1161/STROKEAHA.120.030395
- 31 Immovilli P, Terracciano C, Zaino D, *et al.* Stroke in COVID-19 patients—A case series from Italy. *Int J Stroke* 2020;**0**:1–2. doi:10.1177/1747493020938294
- 32 Jillella D V., Janocko NJ, Nahab F, *et al.* Ischemic stroke in COVID-19: An urgent need for early identification and management. *PLoS One* 2020;**15**:e0239443. doi:10.1371/journal.pone.0239443
- 33 Jin C De, Kim MH, Lee KM, *et al.* Less Myocardial Infarction and Stroke Hospitalizations During Middle East Respiratory Syndrome Coronavirus Epidemic in Korea. *Am J Cardiol* 2020;**132**:176–8. doi:10.1016/j.amjcard.2020.06.065
- 34 Kansagra AP, Goyal MS, Hamilton S, *et al.* Collateral Effect of Covid-19 on Stroke Evaluation in the United States. *N Engl J Med* 2020;;9–10. doi:10.1056/nejmc2014816
- 35 Katz JM, Libman RB, Wang JJ, *et al.* Cerebrovascular Complications of COVID-19. *Stroke* 2020;**51**:e227–31. doi:10.1161/STROKEAHA.120.031265
- 36 Khosravani H, Rajendram P, Notario L, *et al.* Protected Code Stroke: Hyperacute Stroke Management During the Coronavirus Disease 2019 (COVID-19) Pandemic. *Stroke* 2020;**2019**:STROKEAHA120029838. doi:10.1161/STROKEAHA.120.029838
- 37 Lange SJ, Ritchey MD, Goodman AB, *et al.* Potential Indirect Effects of the COVID-19 Pandemic on Use of Emergency Departments for Acute Life-Threatening Conditions — United States, January–May 2020. *MMWR Morb Mortal Wkly Rep* 2020;**69**:795–800. doi:10.15585/mmwr.mm6925e2



- 38 Leira EC, Russman AN, Biller J, *et al.* Preserving stroke care during the COVID-19 pandemic: Potential issues and solutions. *Neurology* Published Online First: 2020. doi:10.1212/WNL.00000000000009713
- 39 Leslie-Mazwi TM, Fargen KM, Levitt M, *et al.* Preserving Access: A Review of Stroke Thrombectomy during the COVID-19 Pandemic. *AJNR Am J Neuroradiol* 2020;;1–6. doi:10.3174/ajnr.A6606
- 40 Li Y, Li M, Wang M, *et al.* Acute cerebrovascular disease following COVID-19: a single center, retrospective, observational study. *Stroke Vasc Neurol* 2020;;1–6. doi:10.1136/svn-2020-000431
- 41 LIMA CFC, HOLANDA JLB, PESSOA MSL, *et al.* Acute ischemic stroke in a patient with COVID-19. *Arq Neuropsiquiatr* 2020;;78:454–5. doi:10.1590/0004-282x20200057
- 42 Lumley-Holmes J, Brake S, Docherty M, *et al.* Emergency ambulance services for heart attack and stroke during UK's COVID-19 lockdown. *Lancet* 2020;;395:e93–4. doi:10.1016/S0140-6736(20)31031-X
- 43 Majidi S, Fifi JT, Ladner TR, *et al.* Emergent Large Vessel Occlusion Stroke During New York City's COVID-19 Outbreak. *Stroke* 2020;;51:2656–63. doi:10.1161/STROKEAHA.120.030397
- 44 Maldonado Sloopjes S, Hammer F, Leempoel J, *et al.* Acute stroke care during the COVID-19 pandemic: difficult, but not impossible! *Acta Neurol Belg* 2020;;2–3. doi:10.1007/s13760-020-01422-2
- 45 Mansour OY, Malik AM, Linfante I. Mechanical Thrombectomy of COVID-19 positive acute ischemic stroke patient: a case report and call for preparedness. *BMC Neurol* 2020;;20:358. doi:10.1186/s12883-020-01930-x
- 46 Markus HS. EXPRESS: COVID-19 and Stroke - A Global World Stroke Organisation perspective. *Int J Stroke* Published Online First: 2020. doi:10.1177/1747493020923472
- 47 Masroor S. Collateral damage of COVID-19 pandemic: Delayed medical care. *J Card Surg* 2020;;2–4. doi:10.1111/jocs.14638
- 48 Merkler AE, Parikh NS, Mir S, *et al.* Risk of Ischemic Stroke in Patients with Covid-19 versus Patients with Influenza. *medRxiv Prepr Serv Heal Sci* 2020;;53:1689–99. doi:10.1101/2020.05.18.20105494
- 49 Meyer D, Meyer BC, Rapp KS, *et al.* A Stroke Care Model at an Academic, Comprehensive Stroke Center During the 2020 COVID-19 Pandemic. *J Stroke Cerebrovasc Dis* 2020;;104927. doi:10.1016/j.jstrokecerebrovasdis.2020.104927
- 50 Mishra AK, George AA, Sargent J. Letter to the Editor Regarding “Acute Stroke Management During the Coronavirus Disease 2019 (COVID-19) Pandemic: From Trough of Disillusionment to Slope of Enlightenment”. *World Neurosurg* 2020;;142:551–2. doi:10.1016/j.wneu.2020.06.111
- 51 Mohamud AY, Patel SC. Intraluminal Carotid Artery Thrombus in COVID-19: Another Danger of Cytokine Storm? *Am J Neuroradiol* 2020;;1–6. doi:10.3174/ajnr.A6674
- 52 Morelli N, Rota E, Terracciano C, *et al.* The Baffling Case of Ischemic Stroke Disappearance from the Casualty Department in the COVID-19 Era. *Eur Neurol* Published Online First: 2020. doi:10.1159/000507666
- 53 Morelli N, Rota E, Terracciano C, *et al.* COVID-19-Related Stroke: Barking up the Wrong Tree? *Eur Neurol*. 2020;;83:218–9. doi:10.1159/000509002
- 54 Nguyen TN, Abdalkader M, Jovin TG, *et al.* Mechanical Thrombectomy in the Era of the COVID-19 Pandemic: Emergency Preparedness for Neuroscience Teams: A Guidance Statement From the Society of Vascular and Interventional Neurology. *Stroke* 2020;;1–6. doi:10.1161/STROKEAHA.120.030100
- 55 Ntaios G, Michel P, Georgiopoulos G, *et al.* Characteristics and Outcomes in Patients With COVID-19 and Acute Ischemic Stroke. *Stroke* 2020;;51. doi:10.1161/STROKEAHA.120.031208
- 56 Ospel JM, Goyal M. Endovascular stroke treatment during the COVID-19 pandemic. *Nat Rev Neurol* Published Online First: 2020. doi:10.1038/s41582-020-0371-1

- 57 Pasarikovski CR, da Costa L. The Impact of the Covid-19 Pandemic on Stroke Volume. *Can J Neurol Sci / J Can des Sci Neurol* 2020;**41**:1–2. doi:10.1017/cjn.2020.116
- 58 Paterson RW, Brown RL, Benjamin L, *et al.* The emerging spectrum of COVID-19 neurology: clinical, radiological and laboratory findings. *Brain* 2020;;2–37. doi:10.1093/brain/awaa240
- 59 Pedicelli A, Valente I, Pilato F, *et al.* Stroke priorities during COVID-19 outbreak: acting both fast and safe. *J Stroke Cerebrovasc Dis* 2020;;104922. doi:10.1016/j.jstrokecerebrovasdis.2020.104922
- 60 Qureshi AI, Abd-Allah F, Alsenani F, *et al.* Management of acute ischemic stroke in patients with COVID-19 infection: Report of an international panel. *Int J Stroke* 2020;**0**:1–15. doi:10.1177/1747493020923234
- 61 Qureshi AI, French BR, Siddiq F, *et al.* COVID-19 Screening with Chest CT in Acute Stroke Imaging: A Clinical Decision Model. *J Neuroimaging* 2020;**30**:617–24. doi:10.1111/jon.12746
- 62 Qureshi AI, Abd-Allah F, Alsenani F, *et al.* Management of acute ischemic stroke in patients with COVID-19 infection: Insights from an international panel. *Am J Emerg Med* Published Online First: 2020. doi:10.1016/j.ajem.2020.05.018
- 63 Reddy ST, Garg T, Shah C, *et al.* Cerebrovascular Disease in Patients with COVID-19: A Review of the Literature and Case Series. *Case Rep Neurol* 2020;**77030**:199–209. doi:10.1159/000508958
- 64 Rodríguez-Pardo J, Fuentes B, Alonso de Leciñana M, *et al.* Acute stroke care during the COVID-19 pandemic. Ictus Madrid Program recommendations. *Neurologia* Published Online First: 2020. doi:10.1016/j.nrl.2020.04.008
- 65 Saggese CE, Del Bianco C, Di Ruzza MR, *et al.* COVID-19 and Stroke: Casual or Causal Role? *Cerebrovasc Dis* 2020;;1–4. doi:10.1159/000509453
- 66 Salahuddin H, Castonguay AC, Zaidi SF, *et al.* Interventional Stroke Care in the Era of COVID-19. *Front Neurol* 2020;**11**:1–8. doi:10.3389/fneur.2020.00468
- 67 Sangalli D, Polonia V, Colombo D, *et al.* A single-centre experience of intravenous thrombolysis for stroke in COVID-19 patients. *Neurol Sci* 2020;**41**:2325–9. doi:10.1007/s10072-020-04591-3
- 68 Shahjouei S, Naderi S, Li J, *et al.* Risk of stroke in hospitalized SARS-CoV-2 infected patients: A multinational study. *EBioMedicine* 2020;**59**:102939. doi:10.1016/j.ebiom.2020.102939
- 69 Sheth SA, Wu T-C, Sharrief A, *et al.* Early Lessons From World War COVID: Reinventing Our Stroke Systems of Care. *Stroke* 2020;;STROKEAHA120030154. doi:10.1161/STROKEAHA.120.030154
- 70 Sierra-Hidalgo F, Muñoz-Rivas N, Torres Rubio P, *et al.* Large artery ischemic stroke in severe COVID-19. *J Neurol* 2020;;3–5. doi:10.1007/s00415-020-09967-1
- 71 Sweid A, Hammoud B, Bekelis K, *et al.* EXPRESS: Brain ischemic and hemorrhagic complications of COVID-19. *Int J Stroke* 2020;;1747493020937189. doi:10.1177/1747493020937189
- 72 Sylaja PN, Srivastava MVP, Shah S, *et al.* The SARS-CoV-2/COVID-19 pandemic and challenges in stroke care in India. *Ann N Y Acad Sci* 2020;;1–8. doi:10.1111/nyas.14379
- 73 Tsivgoulis G, Katsanos AH, Ornello R, *et al.* Ischemic Stroke Epidemiology During the COVID-19 Pandemic: Navigating Uncharted Waters With Changing Tides. *Stroke* 2020;;STROKEAHA120030791. doi:10.1161/STROKEAHA.120.030791
- 74 Valderrama EV, Humbert K, Lord A, *et al.* Severe Acute Respiratory Syndrome Coronavirus 2 Infection and Ischemic Stroke. *Stroke* 2020;;1–4. doi:10.1161/strokeaha.120.030153
- 75 Varatharaj A, Thomas N, Ellul MA, *et al.* Neurological and neuropsychiatric complications of COVID-19 in 153 patients: a UK-wide surveillance study. *The Lancet Psychiatry* 2020;**2**:1–8. doi:10.1016/s2215-0366(20)30287-x
- 76 Venketasubramanian N, Hennerici MG. Stroke in COVID-19 and SARS-CoV-1. *Cerebrovasc Dis* 2020;**188770**:1–2. doi:10.1159/000508370

- 77 Wang X, Chen Y, Li Z, *et al.* Providing uninterrupted care during COVID-19 pandemic: experience from Beijing Tiantan Hospital. *Stroke Vasc Neurol* 2020;:svn-2020-000400. doi:10.1136/svn-2020-000400
- 78 Yaeger KA, Fifi JT, Yim B, *et al.* Initial Stroke Thrombectomy Experience in New York City during the COVID-19 Pandemic. 2020;:1–4.
- 79 Yaghi S, Ishida K, Torres J, *et al.* SARS2-CoV-2 and Stroke in a New York Healthcare System. *Stroke* 2020;:STROKEAHA120030335. doi:10.1161/STROKEAHA.120.030335
- 80 Zhai P, Ding Y, Li Y. The impact of COVID-19 on ischemic stroke. *Diagn Pathol* 2020;15:78. doi:10.1186/s13000-020-00994-0
- 81 Zhao J, Rudd A, Liu R. Challenges and Potential Solutions of Stroke Care During the Coronavirus Disease 2019 (COVID-19) Outbreak. *Stroke* 2020;364:2019–20. doi:10.1161/STROKEAHA.120.029701
- 82 Agarwal S, Scher E, Rossan-Raghunath N, *et al.* Acute stroke care in a New York City comprehensive stroke center during the COVID-19 pandemic. *J Stroke Cerebrovasc Dis* 2020;29:105068. doi:10.1016/j.jstrokecerebrovasdis.2020.105068
- 83 Baracchini C, Pieroni A, Viaro F, *et al.* Acute stroke management pathway during Coronavirus-19 pandemic. *Neurol Sci* Published Online First: 2020. doi:10.1007/s10072-020-04375-9
- 84 de Havenon A, Ney J, Callaghan B, *et al.* A Rapid Decrease in Stroke, Acute Coronary Syndrome, and Corresponding Interventions at 65 United States Hospitals Following Emergence of COVID-19. *medRxiv Prepr Serv Heal Sci* Published Online First: 2020. doi:10.1101/2020.05.07.20083386
- 85 Diegoli H, Magalhães PSC, Martins SCO, *et al.* Decrease in Hospital Admissions for Transient Ischemic Attack , Mild , and Moderate Stroke During the COVID-19 Era. 2020;:1–7. doi:10.1161/STROKEAHA.120.030481
- 86 Esenwa C, Parides MK, Labovitz DL. The effect of COVID-19 on stroke hospitalizations in New York City. *J Stroke Cerebrovasc Dis* 2020;29:105114. doi:10.1016/j.jstrokecerebrovasdis.2020.105114
- 87 Hsiao J, Sayles E, Antzoulatos E, *et al.* Effect of COVID-19 on Emergent Stroke Care: A Regional Experience. *Stroke* 2020;:STROKEAHA120030499. doi:10.1161/STROKEAHA.120.030499
- 88 Huang JF, Greenway MRF, Nasr DM, *et al.* Telestroke in the Time of COVID-19: The Mayo Clinic Experience. *Mayo Clin Proc* 2020;95:1704–8. doi:10.1016/j.mayocp.2020.06.007
- 89 Jasne AS, Chojecka P, Maran I, *et al.* Stroke Code Presentations, Interventions, and Outcomes Before and During the COVID-19 Pandemic. *Stroke* 2020;51:2664–73. doi:10.1161/STR.0000000000000347
- 90 Kerleroux B, Fabacher T, Bricout N, *et al.* Mechanical Thrombectomy for Acute Ischemic Stroke Amid the COVID-19 Outbreak. *Stroke* Published Online First: 20 May 2020. doi:10.1161/STROKEAHA.120.030373
- 91 Mehrpour M, Shuaib A, Farahani M, *et al.* EXPRESS: COVID-19 and stroke in Iran; a case series, and effects on stroke admissions. *Int J Stroke* 2020;:1747493020937397. doi:10.1177/1747493020937397
- 92 Montaner J, Barragán-Prieto A, Pérez-Sánchez S, *et al.* Break in the Stroke Chain of Survival Due to COVID-19. *Stroke* 2020;:STROKEAHA120030106. doi:10.1161/STROKEAHA.120.030106
- 93 Naccarato M, Scali I, Olivo S, *et al.* Has COVID-19 played an unexpected “stroke” on the chain of survival? *J Neurol Sci* 2020;414:116889. doi:10.1016/j.jns.2020.116889
- 94 Nguyen-Huynh MN, Tang XN, Vinson DR, *et al.* Acute Stroke Presentation, Care, and Outcomes in Community Hospitals in Northern California During the COVID-19 Pandemic. *Stroke* 2020;:1–7. doi:10.1161/strokeaha.120.031099
- 95 Onteddu SR, Nalleballe K, Sharma R, *et al.* Underutilization of Healthcare for strokes during the

- COVID-19 outbreak. *Int J Stroke* 2020;:1747493020934362. doi:10.1177/1747493020934362
- 96 Paliwal PR, Tan BYQ, Leow AST, *et al.* Impact of the COVID-19 pandemic on hyperacute stroke treatment: experience from a comprehensive stroke centre in Singapore. *J Thromb Thrombolysis* 2020;2019. doi:10.1007/s11239-020-02225-1
- 97 Pandey AS, Daou BJ, Tsai JP, *et al.* Letter: COVID-19 Pandemic—The Bystander Effect on Stroke Care in Michigan. *Neurosurgery* 2020;0:2020–2. doi:10.1093/neuros/nyaa252
- 98 Perry R, Banaras A, Werring DJ, *et al.* What has caused the fall in stroke admissions during the COVID-19 pandemic? *J Neurol* 2020;:1–2. doi:10.1007/s00415-020-10030-2
- 99 Pop R, Quenardelle V, Hasiu A, *et al.* Impact of the Covid-19 outbreak on acute stroke pathways – Insights from the Alsace region in France. *Eur J Neurol* Published Online First: 2020. doi:10.1111/ene.14316
- 100 Rudilosso S, Laredo C, Vera V, *et al.* Acute Stroke Care Is at Risk in the Era of COVID-19: Experience at a Comprehensive Stroke Center in Barcelona. *Stroke* 2020;:STROKEAHA120030329. doi:10.1161/STROKEAHA.120.030329
- 101 Saxhaug Kristoffersen E, Holt Jahr S, Thommessen B, *et al.* Effect of COVID-19 pandemic on stroke admission rates in a Norwegian population. *Acta Neurol Scand* 2020;:0–2. doi:10.1111/ane.13307
- 102 Schirmer CM, Ringer AJ, Arthur AS, *et al.* Delayed presentation of acute ischemic strokes during the COVID-19 crisis. *J Neurointerv Surg* 2020;:1–4. doi:10.1136/neurintsurg-2020-016299
- 103 Siegler JE, Heslin ME, Thau L, *et al.* Falling stroke rates during COVID-19 pandemic at a Comprehensive Stroke Center: Cover title: Falling stroke rates during COVID-19. *J Stroke Cerebrovasc Dis* 2020;:104953. doi:10.1016/j.jstrokecerebrovasdis.2020.104953
- 104 Strasser S, Miskolczi L, Cunha J, *et al.* COVID-19 Impact on Stroke Presentations. *J Stroke Cerebrovasc Dis* 2020;29:105077. doi:10.1016/j.jstrokecerebrovasdis.2020.105077
- 105 Tejada Meza H, Lambea Gil Á, Sancho Saldaña A, *et al.* Ischaemic stroke in the time of coronavirus disease 2019. *Eur J Neurol* 2020;27:1788–92. doi:10.1111/ene.14327
- 106 Tejada Meza H, Lambea Gil Á, Saldaña AS, *et al.* Impact of COVID-19 outbreak on ischemic stroke admissions and in-hospital mortality in North-West Spain. *Int J Stroke* 2020;:174749302093830. doi:10.1177/1747493020938301
- 107 Teo K-C, Leung WCY, Wong Y-K, *et al.* Delays in Stroke Onset to Hospital Arrival Time During COVID-19. *Stroke* 2020;:STROKEAHA120030105. doi:10.1161/STROKEAHA.120.030105
- 108 Yang B, Wang T, Chen J, *et al.* Impact of the COVID-19 pandemic on the process and outcome of thrombectomy for acute ischemic stroke. *J Neurointerv Surg* 2020;:1–5. doi:10.1136/neurintsurg-2020-016177
- 109 Zhao J, Li H, Kung D, *et al.* Impact of the COVID-19 Epidemic on Stroke Care and Potential Solutions. *Stroke* 2020;:STROKEAHA120030225. doi:10.1161/STROKEAHA.120.030225
- 110 Zini A, Romoli M, Gentile M, *et al.* The stroke mothership model survived during COVID-19 era: an observational single-center study in Emilia-Romagna, Italy. *Neurol Sci* 2020;41:3395–9. doi:10.1007/s10072-020-04754-2
